# Supplementary material for: Conservation of Genetic Diversity of Scots Pine (Pinus sylvestris L.) in a Central European National Park Based on cpDNA Studies
Source: MDPI journal article supplement (doi:10.3390/d14020093), 2022-01-28
Supplement: s1 [file s1]

Table 1S. Geographical coordinates of F1 and F2 plant material from the „S“ locations.

| F1     |                   |                   | F2        |                   |                   |
|--------|-------------------|-------------------|-----------|-------------------|-------------------|
| number |                   |                   | numbers   |                   |                   |
| trees  | N                 | E                 | seedlings | N                 | E                 |
| 1      | 52° 20' 8,232" N  | 20° 46' 23,532" E | 1         | 52° 20' 8,178" N  | 20° 46' 23,898" E |
| 2      | 52° 20' 8,280" N  | 20° 46' 25,386" E | 2         | 52° 20' 7,752" N  | 20° 46' 24,864" E |
| 3      | 52° 20' 8,694" N  | 20° 46' 26,472" E | 3         | 52° 20' 8,490" N  | 20° 46' 26,880" E |
| 4      | 52° 20' 8,688" N  | 20° 46' 28,716" E | 4         | 52° 20' 8,490" N  | 20° 46' 28,572" E |
| 5      | 52° 20' 8,862" N  | 20° 46' 30,600" E | 5         | 52° 20' 8,538" N  | 20° 46' 31,416" E |
| 6      | 52° 20' 8,640" N  | 20° 46' 32,232" E | 6         | 52° 20' 8,736" N  | 20° 46' 32,670" E |
| 7      | 52° 20' 8,874" N  | 20° 46' 34,218" E | 7         | 52° 20' 8,790" N  | 20° 46' 33,774" E |
| 8      | 52° 20' 9,204" N  | 20° 46' 36,084" E | 8         | 52° 20' 9,042" N  | 20° 46' 36,060" E |
| 9      | 52° 20' 9,024" N  | 20° 46' 38,814" E | 9         | 52° 20' 9,132" N  | 20° 46' 37,506" E |
| 10     | 52° 20' 9,960" N  | 20° 46' 40,188" E | 10        | 52° 20' 9,462" N  | 20° 46' 39,690" E |
| 11     | 52° 20' 9,864" N  | 20° 46' 42,198" E | 11        | 52° 20' 9,978" N  | 20° 46' 42,096" E |
| 12     | 52° 20' 10,980" N | 20° 46' 42,726" E | 12        | 52° 20' 10,782" N | 20° 46' 42,822" E |
| 13     | 52° 20' 11,760" N | 20° 46' 43,476" E | 13        | 52° 20' 11,898" N | 20° 46' 43,788" E |
| 14     | 52° 20' 12,768" N | 20° 46' 44,598" E | 14        | 52° 20' 13,128" N | 20° 46' 44,490" E |
| 15     | 52° 20' 14,034" N | 20° 46' 44,916" E | 15        | 52° 20' 13,806" N | 20° 46' 45,000" E |
| 16     | 52° 20' 13,158" N | 20° 46' 43,074" E | 16        | 52° 20' 13,050" N | 20° 46' 43,410" E |
| 17     | 52° 20' 12,672" N | 20° 46' 41,124" E | 17        | 52° 20' 12,060" N | 20° 46' 41,862" E |
| 18     | 52° 20' 11,316" N | 20° 46' 39,552" E | 18        | 52° 20' 11,622" N | 20° 46' 40,026" E |
| 19     | 52° 20' 12,228" N | 20° 46' 37,962" E | 19        | 52° 20' 11,250" N | 20° 46' 37,806" E |
| 20     | 52° 20' 12,504" N | 20° 46' 36,648" E | 20        | 52° 20' 12,246" N | 20° 46' 35,976" E |
| 21     | 52° 20' 12,498" N | 20° 46' 34,728" E | 21        | 52° 20' 13,194" N | 20° 46' 34,164" E |
| 22     | 52° 20' 12,426" N | 20° 46' 31,896" E | 22        | 52° 20' 13,692" N | 20° 46' 31,422" E |
| 23     | 52° 20' 11,934" N | 20° 46' 29,820" E | 23        | 52° 20' 12,954" N | 20° 46' 29,436" E |
| 24     | 52° 20' 11,052" N | 20° 46' 27,954" E | 24        | 52° 20' 12,810" N | 20° 46' 27,660" E |
| 25     | 52° 20' 11,232" N | 20° 46' 25,536" E | 25        | 52° 20' 12,666" N | 20° 46' 25,290" E |
| 26     | 52° 20' 11,856" N | 20° 46' 23,844" E | 26        | 52° 20' 12,546" N | 20° 46' 23,592" E |
| 27     | 52° 20' 13,050" N | 20° 46' 22,068" E | 27        | 52° 20' 12,546" N | 20° 46' 21,330" E |
| 28     | 52° 20' 13,896" N | 20° 46' 23,400" E | 28        | 52° 20' 13,896" N | 20° 46' 21,822" E |
| 29     | 52° 20' 14,478" N | 20° 46' 25,410" E | 29        | 52° 20' 15,348" N | 20° 46' 23,910" E |
| 30     | 52° 20' 14,880" N | 20° 46' 27,444" E | 30        | 52° 20' 14,886" N | 20° 46' 27,072" E |
| 31     | 52° 20' 16,152" N | 20° 46' 28,866" E | 31        | 52° 20' 15,540" N | 20° 46' 29,664" E |
| 32     | 52° 20' 16,188" N | 20° 46' 30,870" E | 32        | 52° 20' 15,882" N | 20° 46' 31,104" E |
| 33     | 52° 20' 16,254" N | 20° 46' 33,204" E | 33        | 52° 20' 16,188" N | 20° 46' 33,768" E |
| 34     | 52° 20' 16,020" N | 20° 46' 34,326" E | 34        | 52° 20' 15,342" N | 20° 46' 34,710" E |
| 35     | 52° 20' 15,372" N | 20° 46' 37,296" E | 35        | 52° 20' 14,280" N | 20° 46' 37,062" E |
| 36     | 52° 20' 14,382" N | 20° 46' 39,120" E | 36        | 52° 20' 13,464" N | 20° 46' 39,204" E |
| 37     | 52° 20' 13,842" N | 20° 46' 41,058" E | 37        | 52° 20' 13,224" N | 20° 46' 40,896" E |
| 38     | 52° 20' 15,912" N | 20° 46' 47,454" E | 38        | 52° 20' 15,600" N | 20° 46' 46,512" E |
| 39     | 52° 20' 16,974" N | 20° 46' 46,278" E | 39        | 52° 20' 17,412" N | 20° 46' 45,360" E |
| 40     | 52° 20' 17,550" N | 20° 46' 43,140" E | 40        | 52° 20' 18,906" N | 20° 46' 43,728" E |
| 41     | 52° 20' 11,286" N | 20° 46' 47,460" E | 41        | 52° 20' 10,746" N | 20° 46' 47,682" E |

|           |                   |                   |           |                   |                   |
|-----------|-------------------|-------------------|-----------|-------------------|-------------------|
| <b>42</b> | 52° 20' 10,026" N | 20° 46' 47,412" E | <b>42</b> | 52° 20' 10,032" N | 20° 46' 48,144" E |
| <b>43</b> | 52° 20' 9,510" N  | 20° 46' 45,600" E | <b>43</b> | 52° 20' 8,682" N  | 20° 46' 48,954" E |
| <b>44</b> | 52° 20' 8,010" N  | 20° 46' 45,456" E | <b>44</b> | 52° 20' 8,388" N  | 20° 46' 48,168" E |
| <b>45</b> | 52° 20' 7,440" N  | 20° 46' 44,208" E | <b>45</b> | 52° 20' 6,234" N  | 20° 46' 44,736" E |
| <b>46</b> | 52° 20' 6,540" N  | 20° 46' 45,090" E | <b>46</b> | 52° 20' 6,426" N  | 20° 46' 44,214" E |
| <b>47</b> | 52° 20' 5,898" N  | 20° 46' 42,096" E | <b>47</b> | 52° 20' 6,054" N  | 20° 46' 42,642" E |
| <b>48</b> | 52° 20' 6,438" N  | 20° 46' 40,752" E | <b>48</b> | 52° 20' 6,810" N  | 20° 46' 40,854" E |
| <b>49</b> | 52° 20' 6,846" N  | 20° 46' 37,914" E |           |                   |                   |
| <b>50</b> | 52° 20' 6,924" N  | 20° 46' 36,036" E |           |                   |                   |

Table 2S. Geographical coordinates of F1 and F2 plant material from the „W” locations.

| number<br>trees | F1                |                   | numbers<br>seedlings | F2                |                   |
|-----------------|-------------------|-------------------|----------------------|-------------------|-------------------|
|                 | N                 | E                 |                      | N                 | E                 |
| <b>1</b>        | 52° 21' 18,576" N | 20° 32' 46,830" E | <b>1</b>             | 52° 21' 18,696" N | 20° 32' 46,224" E |
| <b>2</b>        | 52° 21' 20,202" N | 20° 32' 45,420" E | <b>2</b>             | 52° 21' 20,784" N | 20° 32' 45,726" E |
| <b>3</b>        | 52° 21' 21,732" N | 20° 32' 44,166" E | <b>3</b>             | 52° 21' 22,518" N | 20° 32' 44,784" E |
| <b>4</b>        | 52° 21' 23,268" N | 20° 32' 44,340" E | <b>4</b>             | 52° 21' 23,706" N | 20° 32' 45,420" E |
| <b>5</b>        | 52° 21' 25,080" N | 20° 32' 44,676" E | <b>5</b>             | 52° 21' 25,212" N | 20° 32' 45,978" E |
| <b>6</b>        | 52° 21' 26,994" N | 20° 32' 43,878" E | <b>6</b>             | 52° 21' 26,442" N | 20° 32' 44,154" E |
| <b>7</b>        | 52° 21' 29,490" N | 20° 32' 44,694" E | <b>7</b>             | 52° 21' 28,926" N | 20° 32' 45,822" E |
| <b>8</b>        | 52° 21' 31,860" N | 20° 32' 44,220" E | <b>8</b>             | 52° 21' 31,656" N | 20° 32' 46,566" E |
| <b>9</b>        | 52° 21' 34,230" N | 20° 32' 42,246" E | <b>9</b>             | 52° 21' 33,654" N | 20° 32' 42,852" E |
| <b>10</b>       | 52° 21' 35,538" N | 20° 32' 40,206" E | <b>10</b>            | 52° 21' 34,824" N | 20° 32' 41,382" E |
| <b>11</b>       | 52° 21' 37,776" N | 20° 32' 39,012" E | <b>11</b>            | 52° 21' 35,736" N | 20° 32' 38,664" E |
| <b>12</b>       | 52° 21' 37,572" N | 20° 32' 35,406" E | <b>12</b>            | 52° 21' 37,332" N | 20° 32' 39,774" E |
| <b>13</b>       | 52° 21' 35,178" N | 20° 32' 35,556" E | <b>13</b>            | 52° 21' 37,056" N | 20° 32' 35,952" E |
| <b>14</b>       | 52° 21' 33,582" N | 20° 32' 36,060" E | <b>14</b>            | 52° 21' 30,882" N | 20° 32' 38,664" E |
| <b>15</b>       | 52° 21' 31,746" N | 20° 32' 37,098" E | <b>15</b>            | 52° 21' 29,670" N | 20° 32' 38,538" E |
| <b>16</b>       | 52° 21' 29,718" N | 20° 32' 38,880" E | <b>16</b>            | 52° 21' 28,596" N | 20° 32' 41,346" E |
| <b>17</b>       | 52° 21' 28,212" N | 20° 32' 40,518" E | <b>17</b>            | 52° 21' 26,520" N | 20° 32' 40,698" E |
| <b>18</b>       | 52° 21' 26,580" N | 20° 32' 40,914" E | <b>18</b>            | 52° 21' 25,242" N | 20° 32' 39,390" E |
| <b>19</b>       | 52° 21' 24,870" N | 20° 32' 40,182" E | <b>19</b>            | 52° 21' 24,072" N | 20° 32' 39,660" E |
| <b>20</b>       | 52° 21' 22,602" N | 20° 32' 38,034" E | <b>20</b>            | 52° 21' 23,010" N | 20° 32' 38,526" E |
| <b>21</b>       | 52° 21' 20,670" N | 20° 32' 39,480" E | <b>21</b>            | 52° 21' 21,000" N | 20° 32' 38,688" E |
| <b>22</b>       | 52° 21' 19,296" N | 20° 32' 38,952" E | <b>22</b>            | 52° 21' 20,124" N | 20° 32' 39,462" E |
| <b>23</b>       | 52° 21' 17,526" N | 20° 32' 31,386" E | <b>23</b>            | 52° 21' 18,678" N | 20° 32' 33,216" E |
| <b>24</b>       | 52° 21' 18,504" N | 20° 32' 30,282" E | <b>24</b>            | 52° 21' 21,066" N | 20° 32' 32,532" E |
| <b>25</b>       | 52° 21' 20,838" N | 20° 32' 30,972" E | <b>25</b>            | 52° 21' 24,330" N | 20° 32' 28,542" E |
| <b>26</b>       | 52° 21' 22,446" N | 20° 32' 30,540" E | <b>26</b>            | 52° 21' 27,588" N | 20° 32' 34,032" E |
| <b>27</b>       | 52° 21' 23,994" N | 20° 32' 29,994" E | <b>27</b>            | 52° 21' 28,326" N | 20° 32' 34,608" E |
| <b>28</b>       | 52° 21' 25,506" N | 20° 32' 29,388" E | <b>28</b>            | 52° 21' 29,040" N | 20° 32' 31,938" E |
| <b>29</b>       | 52° 21' 27,348" N | 20° 32' 29,814" E | <b>29</b>            | 52° 21' 31,056" N | 20° 32' 32,928" E |
| <b>30</b>       | 52° 21' 29,694" N | 20° 32' 32,370" E | <b>30</b>            | 52° 21' 36,480" N | 20° 32' 30,174" E |
| <b>31</b>       | 52° 21' 31,638" N | 20° 32' 32,202" E | <b>31</b>            | 52° 21' 37,548" N | 20° 32' 33,024" E |
| <b>32</b>       | 52° 21' 34,134" N | 20° 32' 33,090" E | <b>32</b>            | 52° 21' 38,832" N | 20° 32' 34,146" E |

|    |                   |                   |    |                   |                   |
|----|-------------------|-------------------|----|-------------------|-------------------|
| 33 | 52° 21' 35,256" N | 20° 32' 31,902" E | 33 | 52° 21' 40,788" N | 20° 32' 35,016" E |
| 34 | 52° 21' 37,662" N | 20° 32' 32,220" E | 34 | 52° 21' 41,796" N | 20° 32' 37,242" E |
| 35 | 52° 21' 40,668" N | 20° 32' 36,168" E | 35 | 52° 21' 42,636" N | 20° 32' 38,316" E |
| 36 | 52° 21' 42,330" N | 20° 32' 37,320" E | 36 | 52° 21' 43,086" N | 20° 32' 38,676" E |
| 37 | 52° 21' 43,896" N | 20° 32' 38,928" E | 37 | 52° 21' 44,964" N | 20° 32' 40,338" E |
| 38 | 52° 21' 46,818" N | 20° 32' 38,706" E | 38 | 52° 21' 46,764" N | 20° 32' 39,714" E |
| 39 | 52° 21' 45,900" N | 20° 32' 41,142" E | 39 | 52° 21' 48,438" N | 20° 32' 39,498" E |
| 40 | 52° 21' 48,576" N | 20° 32' 38,736" E | 40 | 52° 21' 49,506" N | 20° 32' 37,806" E |
| 41 | 52° 21' 50,982" N | 20° 32' 38,526" E | 41 | 52° 21' 50,844" N | 20° 32' 39,396" E |
| 42 | 52° 21' 52,542" N | 20° 32' 38,400" E | 42 | 52° 21' 51,906" N | 20° 32' 40,050" E |
| 43 | 52° 21' 54,024" N | 20° 32' 36,882" E | 43 | 52° 21' 53,358" N | 20° 32' 38,352" E |
| 44 | 52° 21' 55,512" N | 20° 32' 34,338" E | 44 | 52° 21' 54,600" N | 20° 32' 34,584" E |
| 45 | 52° 21' 57,780" N | 20° 32' 35,154" E |    |                   |                   |
| 46 | 52° 21' 59,220" N | 20° 32' 34,266" E |    |                   |                   |
| 47 | 52° 22' 1,188" N  | 20° 32' 32,688" E |    |                   |                   |
| 48 | 52° 22' 3,042" N  | 20° 32' 30,630" E |    |                   |                   |
| 49 | 52° 22' 3,504" N  | 20° 32' 35,196" E |    |                   |                   |
| 50 | 52° 22' 6,018" N  | 20° 32' 35,400" E |    |                   |                   |

Table 3S. Geographical coordinates of F1 and F2 plant material from the „CG“ locations.

| number trees | F1                |                   | numbers seedlings | F2                |                   |
|--------------|-------------------|-------------------|-------------------|-------------------|-------------------|
|              | N                 | E                 |                   | N                 | E                 |
| 1            | 52° 20' 14,772" N | 20° 23' 45,876" E | 1                 | 52° 20' 22,368" N | 20° 23' 45,840" E |
| 2            | 52° 20' 16,224" N | 20° 23' 46,092" E | 2                 | 52° 20' 22,176" N | 20° 23' 46,296" E |
| 3            | 52° 20' 18,366" N | 20° 23' 46,224" E | 3                 | 52° 20' 23,622" N | 20° 23' 45,252" E |
| 4            | 52° 20' 19,614" N | 20° 23' 44,526" E | 4                 | 52° 20' 24,996" N | 20° 23' 44,766" E |
| 5            | 52° 20' 21,546" N | 20° 23' 44,976" E | 5                 | 52° 20' 26,706" N | 20° 23' 44,484" E |
| 6            | 52° 20' 23,532" N | 20° 23' 43,554" E | 6                 | 52° 20' 27,702" N | 20° 23' 45,096" E |
| 7            | 52° 20' 26,220" N | 20° 23' 43,434" E | 7                 | 52° 20' 28,680" N | 20° 23' 43,212" E |
| 8            | 52° 20' 28,074" N | 20° 23' 43,530" E | 8                 | 52° 20' 29,172" N | 20° 23' 43,446" E |
| 9            | 52° 20' 30,726" N | 20° 23' 43,248" E | 9                 | 52° 20' 29,352" N | 20° 23' 44,670" E |
| 10           | 52° 20' 32,322" N | 20° 23' 43,704" E | 10                | 52° 20' 29,430" N | 20° 23' 43,638" E |
| 11           | 52° 20' 34,716" N | 20° 23' 43,464" E | 11                | 52° 20' 34,086" N | 20° 23' 44,028" E |
| 12           | 52° 20' 36,558" N | 20° 23' 44,556" E | 12                | 52° 20' 33,096" N | 20° 23' 46,182" E |
| 13           | 52° 20' 38,106" N | 20° 23' 40,116" E | 13                | 52° 20' 33,888" N | 20° 23' 43,608" E |
| 14           | 52° 20' 35,928" N | 20° 23' 40,230" E | 14                | 52° 20' 34,590" N | 20° 23' 43,980" E |
| 15           | 52° 20' 34,116" N | 20° 23' 39,312" E | 15                | 52° 20' 34,734" N | 20° 23' 43,008" E |
| 16           | 52° 20' 32,844" N | 20° 23' 39,576" E | 16                | 52° 20' 34,860" N | 20° 23' 40,314" E |
| 17           | 52° 20' 31,008" N | 20° 23' 39,138" E | 17                | 52° 20' 33,912" N | 20° 23' 38,520" E |
| 18           | 52° 20' 29,094" N | 20° 23' 38,406" E | 18                | 52° 20' 32,868" N | 20° 23' 38,814" E |
| 19           | 52° 20' 27,696" N | 20° 23' 38,802" E | 19                | 52° 20' 30,474" N | 20° 23' 37,464" E |
| 20           | 52° 20' 25,992" N | 20° 23' 38,118" E | 20                | 52° 20' 27,756" N | 20° 23' 38,442" E |
| 21           | 52° 20' 24,762" N | 20° 23' 40,992" E | 21                | 52° 20' 25,674" N | 20° 23' 40,704" E |
| 22           | 52° 20' 22,572" N | 20° 23' 40,224" E | 22                | 52° 20' 23,454" N | 20° 23' 41,250" E |

|    |                   |                   |    |                   |                   |
|----|-------------------|-------------------|----|-------------------|-------------------|
| 23 | 52° 20' 20,550" N | 20° 23' 39,204" E | 23 | 52° 20' 21,204" N | 20° 23' 42,480" E |
| 24 | 52° 20' 18,840" N | 20° 23' 39,438" E | 24 | 52° 20' 18,030" N | 20° 23' 45,744" E |
| 25 | 52° 20' 16,524" N | 20° 23' 39,822" E | 25 | 52° 20' 28,884" N | 20° 24' 23,472" E |
| 26 | 52° 20' 15,690" N | 20° 23' 41,466" E | 26 | 52° 20' 28,632" N | 20° 24' 23,844" E |
| 27 | 52° 20' 20,304" N | 20° 24' 24,054" E | 27 | 52° 20' 28,050" N | 20° 24' 25,254" E |
| 28 | 52° 20' 21,768" N | 20° 24' 25,596" E | 28 | 52° 20' 27,816" N | 20° 24' 25,590" E |
| 29 | 52° 20' 23,334" N | 20° 24' 25,680" E | 29 | 52° 20' 21,684" N | 20° 24' 29,130" E |
| 30 | 52° 20' 25,128" N | 20° 24' 25,326" E | 30 | 52° 20' 21,468" N | 20° 24' 32,712" E |
| 31 | 52° 20' 26,862" N | 20° 24' 26,418" E | 31 | 52° 20' 21,948" N | 20° 24' 32,010" E |
| 32 | 52° 20' 28,368" N | 20° 24' 26,562" E | 32 | 52° 20' 22,434" N | 20° 24' 32,022" E |
| 33 | 52° 20' 27,834" N | 20° 24' 29,484" E | 33 | 52° 20' 24,906" N | 20° 24' 33,240" E |
| 34 | 52° 20' 26,520" N | 20° 24' 29,340" E | 34 | 52° 20' 25,290" N | 20° 24' 33,198" E |
| 35 | 52° 20' 24,912" N | 20° 24' 29,520" E | 35 | 52° 20' 27,108" N | 20° 24' 34,194" E |
| 36 | 52° 20' 23,724" N | 20° 24' 28,464" E | 36 | 52° 20' 34,044" N | 20° 24' 36,330" E |
| 37 | 52° 20' 20,952" N | 20° 24' 28,302" E | 37 | 52° 20' 34,404" N | 20° 24' 36,600" E |
| 38 | 52° 20' 19,158" N | 20° 24' 28,380" E | 38 | 52° 20' 36,096" N | 20° 24' 38,292" E |
| 39 | 52° 20' 19,626" N | 20° 24' 30,822" E | 39 | 52° 20' 36,498" N | 20° 24' 38,646" E |
| 40 | 52° 20' 22,998" N | 20° 24' 34,392" E | 40 | 52° 20' 36,552" N | 20° 24' 39,060" E |
| 41 | 52° 20' 21,306" N | 20° 24' 32,274" E | 41 | 52° 20' 39,132" N | 20° 24' 37,596" E |
| 42 | 52° 20' 24,714" N | 20° 24' 33,852" E | 42 | 52° 20' 39,000" N | 20° 24' 37,146" E |
| 43 | 52° 20' 25,974" N | 20° 24' 34,716" E | 43 | 52° 20' 38,178" N | 20° 24' 36,072" E |
| 44 | 52° 20' 27,198" N | 20° 24' 36,252" E | 44 | 52° 20' 38,370" N | 20° 24' 35,022" E |
| 45 | 52° 20' 33,096" N | 20° 24' 37,836" E |    |                   |                   |
| 46 | 52° 20' 36,300" N | 20° 24' 36,384" E |    |                   |                   |
| 47 | 52° 20' 39,054" N | 20° 24' 36,732" E |    |                   |                   |
| 48 | 52° 20' 40,410" N | 20° 24' 36,000" E |    |                   |                   |
| 49 | 52° 20' 39,822" N | 20° 24' 33,744" E |    |                   |                   |
| 50 | 52° 20' 38,262" N | 20° 24' 31,968" E |    |                   |                   |

Table 4S. Geographical coordinates of F1 and F2 plant material from the „Gr“ locations.

| number<br>trees | F1                |                   | numbers<br>seedlings | F2                |                   |
|-----------------|-------------------|-------------------|----------------------|-------------------|-------------------|
|                 | N                 | E                 |                      | N                 | E                 |
| 1               | 52° 17' 22,896" N | 20° 28' 20,910" E | 1                    | 52° 17' 12,372" N | 20° 28' 15,954" E |
| 2               | 52° 17' 25,032" N | 20° 28' 20,112" E | 2                    | 52° 17' 12,816" N | 20° 28' 16,434" E |
| 3               | 52° 17' 26,946" N | 20° 28' 20,124" E | 3                    | 52° 17' 14,076" N | 20° 28' 17,934" E |
| 4               | 52° 17' 28,644" N | 20° 28' 19,950" E | 4                    | 52° 17' 19,188" N | 20° 28' 17,706" E |
| 5               | 52° 17' 30,552" N | 20° 28' 18,546" E | 5                    | 52° 17' 22,092" N | 20° 28' 12,696" E |
| 6               | 52° 17' 32,376" N | 20° 28' 17,892" E | 6                    | 52° 17' 21,606" N | 20° 28' 12,834" E |
| 7               | 52° 17' 34,284" N | 20° 28' 19,914" E | 7                    | 52° 17' 20,610" N | 20° 28' 12,030" E |

|    |                   |                   |    |                   |                   |
|----|-------------------|-------------------|----|-------------------|-------------------|
| 8  | 52° 17' 33,660" N | 20° 28' 12,372" E | 8  | 52° 17' 20,580" N | 20° 28' 11,478" E |
| 9  | 52° 17' 31,926" N | 20° 28' 11,802" E | 9  | 52° 17' 19,812" N | 20° 28' 11,940" E |
| 10 | 52° 17' 29,778" N | 20° 28' 11,898" E | 10 | 52° 17' 20,172" N | 20° 28' 10,512" E |
| 11 | 52° 17' 27,906" N | 20° 28' 9,984" E  | 11 | 52° 17' 19,782" N | 20° 28' 10,770" E |
| 12 | 52° 17' 25,776" N | 20° 28' 8,022" E  | 12 | 52° 17' 19,128" N | 20° 28' 10,608" E |
| 13 | 52° 17' 24,150" N | 20° 28' 9,204" E  | 13 | 52° 17' 18,552" N | 20° 28' 8,730" E  |
| 14 | 52° 17' 22,212" N | 20° 28' 7,680" E  | 14 | 52° 17' 17,790" N | 20° 28' 8,280" E  |
| 15 | 52° 17' 19,200" N | 20° 28' 9,330" E  | 15 | 52° 17' 19,218" N | 20° 28' 7,974" E  |
| 16 | 52° 17' 17,993" N | 20° 28' 9,971" E  | 16 | 52° 17' 18,312" N | 20° 28' 7,674" E  |
| 17 | 52° 17' 14,988" N | 20° 28' 10,458" E | 17 | 52° 17' 18,552" N | 20° 28' 6,510" E  |
| 18 | 52° 17' 12,912" N | 20° 28' 6,960" E  | 18 | 52° 17' 18,348" N | 20° 28' 6,516" E  |
| 19 | 52° 17' 14,598" N | 20° 28' 5,172" E  | 19 | 52° 17' 18,572" N | 20° 28' 4,647" E  |
| 20 | 52° 17' 18,240" N | 20° 28' 3,498" E  | 20 | 52° 17' 19,263" N | 20° 28' 2,826" E  |
| 21 | 52° 17' 20,400" N | 20° 28' 3,468" E  | 21 | 52° 17' 18,303" N | 20° 28' 1,453" E  |
| 22 | 52° 17' 22,926" N | 20° 28' 1,602" E  | 22 | 52° 17' 17,224" N | 20° 28' 1,418" E  |
| 23 | 52° 17' 24,942" N | 20° 28' 3,792" E  | 23 | 52° 17' 19,749" N | 20° 28' 0,914" E  |
| 24 | 52° 17' 28,704" N | 20° 28' 3,492" E  | 24 | 52° 17' 17,113" N | 20° 27' 53,786" E |
| 25 | 52° 17' 30,918" N | 20° 28' 3,606" E  | 25 | 52° 17' 17,488" N | 20° 27' 52,542" E |
| 26 | 52° 17' 33,312" N | 20° 28' 3,078" E  | 26 | 52° 17' 17,088" N | 20° 28' 10,092" E |
| 27 | 52° 17' 10,344" N | 20° 27' 59,838" E | 27 | 52° 17' 20,442" N | 20° 28' 13,218" E |
| 28 | 52° 17' 12,582" N | 20° 28' 0,492" E  | 28 | 52° 17' 21,720" N | 20° 28' 11,718" E |
| 29 | 52° 17' 14,970" N | 20° 28' 1,320" E  | 29 | 52° 17' 20,568" N | 20° 28' 8,868" E  |
| 30 | 52° 17' 17,472" N | 20° 27' 59,304" E | 30 | 52° 17' 21,762" N | 20° 28' 5,928" E  |
| 31 | 52° 17' 19,554" N | 20° 27' 59,370" E | 31 | 52° 17' 21,672" N | 20° 28' 5,406" E  |
| 32 | 52° 17' 21,582" N | 20° 27' 58,836" E | 32 | 52° 17' 20,838" N | 20° 28' 4,770" E  |
| 33 | 52° 17' 24,276" N | 20° 27' 57,534" E | 33 | 52° 17' 21,546" N | 20° 28' 5,154" E  |
| 34 | 52° 17' 25,884" N | 20° 27' 57,540" E | 34 | 52° 17' 20,298" N | 20° 28' 4,584" E  |
| 35 | 52° 17' 27,174" N | 20° 27' 58,428" E | 35 | 52° 17' 18,714" N | 20° 27' 54,900" E |
| 36 | 52° 17' 29,658" N | 20° 27' 58,638" E | 36 | 52° 17' 18,606" N | 20° 27' 55,926" E |
| 37 | 52° 17' 31,470" N | 20° 27' 58,596" E | 37 | 52° 17' 18,804" N | 20° 27' 54,864" E |

|    |                   |                   |    |                   |                   |
|----|-------------------|-------------------|----|-------------------|-------------------|
| 38 | 52° 17' 31,986" N | 20° 27' 52,914" E | 38 | 52° 17' 18,996" N | 20° 27' 55,752" E |
| 39 | 52° 17' 30,756" N | 20° 27' 50,760" E | 39 | 52° 17' 20,118" N | 20° 27' 52,860" E |
| 40 | 52° 17' 29,214" N | 20° 27' 47,988" E | 40 | 52° 17' 22,680" N | 20° 27' 53,676" E |
| 41 | 52° 17' 26,682" N | 20° 27' 47,292" E | 41 | 52° 17' 23,334" N | 20° 27' 55,170" E |
| 42 | 52° 17' 25,176" N | 20° 27' 47,016" E | 42 | 52° 17' 25,296" N | 20° 27' 46,356" E |
| 43 | 52° 17' 23,478" N | 20° 27' 48,414" E | 43 | 52° 17' 17,983" N | 20° 27' 44,745" E |
| 44 | 52° 17' 21,438" N | 20° 27' 49,362" E | 44 | 52° 17' 21,780" N | 20° 27' 48,990" E |
| 45 | 52° 17' 18,756" N | 20° 27' 49,878" E | 45 | 52° 17' 22,086" N | 20° 27' 48,672" E |
| 46 | 52° 17' 16,590" N | 20° 27' 52,338" E | 46 | 52° 17' 21,990" N | 20° 27' 48,720" E |
| 47 | 52° 17' 14,448" N | 20° 27' 51,024" E | 47 | 52° 17' 21,444" N | 20° 27' 49,770" E |
| 48 | 52° 17' 12,942" N | 20° 27' 50,028" E | 48 | 52° 17' 17,029" N | 20° 27' 48,534" E |
| 49 | 52° 17' 13,674" N | 20° 27' 47,850" E | 49 | 52° 17' 17,058" N | 20° 27' 50,052" E |
| 50 | 52° 17' 15,576" N | 20° 27' 47,190" E |    |                   |                   |

Table 5S. Geographical coordinates of F1 and F2 plant material from the „N“ locations.

| number<br>trees | F1                |                   | numbers<br>seedlings | F2                |                   |
|-----------------|-------------------|-------------------|----------------------|-------------------|-------------------|
|                 | N                 | E                 |                      | N                 | E                 |
| 1               | 52° 17' 44,226" N | 20° 29' 52,026" E | 1                    | 52° 17' 44,610" N | 20° 30' 7,726" E  |
| 2               | 52° 17' 45,162" N | 20° 29' 53,538" E | 2                    | 52° 17' 45,012" N | 20° 30' 11,149" E |
| 3               | 52° 17' 43,404" N | 20° 29' 54,684" E | 3                    | 52° 17' 45,398" N | 20° 30' 13,118" E |
| 4               | 52° 17' 44,556" N | 20° 29' 56,898" E | 4                    | 52° 17' 46,323" N | 20° 30' 13,149" E |
| 5               | 52° 17' 43,872" N | 20° 29' 59,154" E | 5                    | 52° 17' 47,061" N | 20° 30' 14,348" E |
| 6               | 52° 17' 43,062" N | 20° 30' 2,346" E  | 6                    | 52° 17' 47,754" N | 20° 30' 13,756" E |
| 7               | 52° 17' 43,182" N | 20° 30' 4,044" E  | 7                    | 52° 17' 48,419" N | 20° 30' 12,717" E |
| 8               | 52° 17' 43,608" N | 20° 30' 7,956" E  | 8                    | 52° 17' 48,163" N | 20° 30' 11,255" E |
| 9               | 52° 17' 43,944" N | 20° 30' 10,650" E | 9                    | 52° 17' 47,483" N | 20° 30' 10,841" E |
| 10              | 52° 17' 44,370" N | 20° 30' 13,662" E | 10                   | 52° 17' 49,819" N | 20° 30' 13,100" E |
| 11              | 52° 17' 46,176" N | 20° 30' 15,216" E | 11                   | 52° 17' 50,920" N | 20° 30' 12,690" E |
| 12              | 52° 17' 45,756" N | 20° 30' 14,022" E | 12                   | 52° 17' 51,281" N | 20° 30' 11,305" E |
| 13              | 52° 17' 46,608" N | 20° 30' 13,698" E | 13                   | 52° 17' 51,508" N | 20° 30' 9,636" E  |
| 14              | 52° 17' 47,052" N | 20° 30' 10,146" E | 14                   | 52° 17' 51,734" N | 20° 30' 8,023" E  |
| 15              | 52° 17' 48,090" N | 20° 30' 10,020" E | 15                   | 52° 17' 52,344" N | 20° 30' 11,229" E |
| 16              | 52° 17' 47,448" N | 20° 30' 7,734" E  | 16                   | 52° 17' 53,186" N | 20° 30' 9,693" E  |
| 17              | 52° 17' 46,938" N | 20° 30' 7,566" E  | 17                   | 52° 17' 54,165" N | 20° 30' 10,844" E |
| 18              | 52° 17' 47,886" N | 20° 30' 4,194" E  | 18                   | 52° 17' 53,240" N | 20° 30' 8,130" E  |
| 19              | 52° 17' 46,422" N | 20° 30' 2,796" E  | 19                   | 52° 17' 53,977" N | 20° 30' 9,440" E  |
| 20              | 52° 17' 48,012" N | 20° 30' 2,076" E  | 20                   | 52° 17' 55,050" N | 20° 30' 11,321" E |
| 21              | 52° 17' 47,916" N | 20° 29' 59,340" E | 21                   | 52° 17' 53,120" N | 20° 30' 12,206" E |

|    |                   |                   |    |                   |                   |
|----|-------------------|-------------------|----|-------------------|-------------------|
| 22 | 52° 17' 46,116" N | 20° 30' 0,162" E  | 22 | 52° 17' 52,709" N | 20° 30' 6,770" E  |
| 23 | 52° 17' 48,012" N | 20° 29' 57,384" E | 23 | 52° 17' 52,174" N | 20° 30' 5,746" E  |
| 24 | 52° 17' 47,016" N | 20° 29' 58,560" E | 24 | 52° 17' 51,605" N | 20° 30' 4,665" E  |
| 25 | 52° 17' 47,418" N | 20° 29' 56,232" E | 25 | 52° 17' 50,785" N | 20° 30' 7,152" E  |
| 26 | 52° 17' 48,882" N | 20° 29' 55,818" E | 26 | 52° 17' 50,468" N | 20° 30' 10,551" E |
| 27 | 52° 17' 49,674" N | 20° 29' 59,586" E | 27 | 52° 17' 49,592" N | 20° 30' 12,030" E |
| 28 | 52° 17' 48,942" N | 20° 30' 1,134" E  | 28 | 52° 17' 46,512" N | 20° 30' 3,654" E  |
| 29 | 52° 17' 49,020" N | 20° 30' 3,084" E  | 29 | 52° 17' 48,155" N | 20° 30' 1,139" E  |
| 30 | 52° 17' 48,648" N | 20° 30' 7,644" E  | 30 | 52° 17' 48,784" N | 20° 30' 0,154" E  |
| 31 | 52° 17' 48,816" N | 20° 30' 9,180" E  | 31 | 52° 17' 50,014" N | 20° 30' 3,102" E  |
| 32 | 52° 17' 48,858" N | 20° 30' 11,388" E | 32 | 52° 17' 49,735" N | 20° 30' 0,857" E  |
| 33 | 52° 17' 49,122" N | 20° 30' 6,750" E  | 33 | 52° 17' 49,313" N | 20° 30' 4,364" E  |
| 34 | 52° 17' 49,080" N | 20° 30' 13,152" E | 34 | 52° 17' 47,687" N | 20° 30' 2,912" E  |
| 35 | 52° 17' 49,962" N | 20° 30' 8,880" E  | 35 | 52° 17' 48,585" N | 20° 30' 2,327" E  |
| 36 | 52° 17' 48,684" N | 20° 30' 14,592" E |    |                   |                   |
| 37 | 52° 17' 50,142" N | 20° 30' 14,514" E |    |                   |                   |
| 38 | 52° 17' 50,298" N | 20° 30' 12,078" E |    |                   |                   |
| 39 | 52° 17' 50,706" N | 20° 30' 14,274" E |    |                   |                   |
| 40 | 52° 17' 51,660" N | 20° 30' 13,518" E |    |                   |                   |
| 41 | 52° 17' 51,786" N | 20° 30' 12,204" E |    |                   |                   |
| 42 | 52° 17' 52,026" N | 20° 30' 9,324" E  |    |                   |                   |
| 43 | 52° 17' 50,322" N | 20° 30' 5,646" E  |    |                   |                   |
| 44 | 52° 17' 49,500" N | 20° 30' 2,520" E  |    |                   |                   |
| 45 | 52° 17' 54,534" N | 20° 30' 7,380" E  |    |                   |                   |
| 46 | 52° 17' 55,332" N | 20° 30' 9,894" E  |    |                   |                   |
| 47 | 52° 17' 58,044" N | 20° 30' 12,660" E |    |                   |                   |
| 48 | 52° 17' 43,932" N | 20° 29' 51,486" E |    |                   |                   |

Table 6S. Geographical coordinates of F1 and F2 plant material from the „KG“ locations.

| number trees | F1                |                   | numbers seedlings | F2                |                   |
|--------------|-------------------|-------------------|-------------------|-------------------|-------------------|
|              | N                 | E                 |                   | N                 | E                 |
| 1            | 52° 20' 23,478" N | 20° 25' 4,164" E  | 1                 | 52° 20' 24,146" N | 20° 25' 7,570" E  |
| 2            | 52° 20' 23,382" N | 20° 25' 5,526" E  | 2                 | 52° 20' 25,624" N | 20° 25' 9,366" E  |
| 3            | 52° 20' 23,208" N | 20° 25' 8,970" E  | 3                 | 52° 20' 26,450" N | 20° 25' 11,910" E |
| 4            | 52° 20' 25,182" N | 20° 25' 11,514" E | 4                 | 52° 20' 26,895" N | 20° 25' 14,022" E |
| 5            | 52° 20' 26,100" N | 20° 25' 14,196" E | 5                 | 52° 20' 27,009" N | 20° 25' 18,851" E |
| 6            | 52° 20' 27,360" N | 20° 25' 17,472" E | 6                 | 52° 20' 25,777" N | 20° 25' 21,539" E |
| 7            | 52° 20' 28,578" N | 20° 25' 20,982" E | 7                 | 52° 20' 24,603" N | 20° 25' 22,970" E |
| 8            | 52° 20' 27,996" N | 20° 25' 23,568" E | 8                 | 52° 20' 24,500" N | 20° 25' 24,435" E |
| 9            | 52° 20' 26,988" N | 20° 25' 21,498" E | 9                 | 52° 20' 25,496" N | 20° 25' 23,558" E |
| 10           | 52° 20' 25,572" N | 20° 25' 20,550" E | 10                | 52° 20' 26,661" N | 20° 25' 22,826" E |
| 11           | 52° 20' 25,218" N | 20° 25' 22,734" E | 11                | 52° 20' 27,565" N | 20° 25' 22,436" E |
| 12           | 52° 20' 24,012" N | 20° 25' 25,110" E | 12                | 52° 20' 28,924" N | 20° 25' 23,388" E |
| 13           | 52° 20' 22,530" N | 20° 25' 21,762" E | 13                | 52° 20' 29,994" N | 20° 25' 23,493" E |

|    |                   |                   |    |                   |                   |
|----|-------------------|-------------------|----|-------------------|-------------------|
| 14 | 52° 20' 24,498" N | 20° 25' 22,038" E | 14 | 52° 20' 30,535" N | 20° 25' 21,272" E |
| 15 | 52° 20' 30,234" N | 20° 25' 25,116" E | 15 | 52° 20' 32,892" N | 20° 25' 14,005" E |
| 16 | 52° 20' 29,880" N | 20° 25' 21,906" E | 16 | 52° 20' 33,467" N | 20° 25' 12,485" E |
| 17 | 52° 20' 29,244" N | 20° 25' 19,116" E | 17 | 52° 20' 33,662" N | 20° 25' 10,533" E |
| 18 | 52° 20' 28,806" N | 20° 25' 16,656" E | 18 | 52° 20' 32,479" N | 20° 25' 9,166" E  |
| 19 | 52° 20' 27,804" N | 20° 25' 12,780" E | 19 | 52° 20' 32,235" N | 20° 25' 11,676" E |
| 20 | 52° 20' 26,898" N | 20° 25' 9,888" E  | 20 | 52° 20' 32,135" N | 20° 25' 12,861" E |
| 21 | 52° 20' 25,926" N | 20° 25' 8,154" E  | 21 | 52° 20' 26,218" N | 20° 25' 24,001" E |
| 22 | 52° 20' 24,690" N | 20° 25' 6,540" E  | 22 | 52° 20' 25,891" N | 20° 25' 22,731" E |
| 23 | 52° 20' 24,774" N | 20° 25' 4,020" E  | 23 | 52° 20' 26,430" N | 20° 25' 20,651" E |
| 24 | 52° 20' 26,526" N | 20° 25' 3,612" E  | 24 | 52° 20' 27,491" N | 20° 25' 21,454" E |
| 25 | 52° 20' 26,064" N | 20° 25' 6,264" E  | 25 | 52° 20' 27,082" N | 20° 25' 23,399" E |
| 26 | 52° 20' 26,994" N | 20° 25' 7,842" E  | 26 | 52° 20' 24,893" N | 20° 25' 23,818" E |
| 27 | 52° 20' 27,360" N | 20° 25' 10,566" E | 27 | 52° 20' 30,474" N | 20° 25' 22,739" E |
| 28 | 52° 20' 29,598" N | 20° 25' 11,838" E | 28 | 52° 20' 29,205" N | 20° 25' 17,873" E |
| 29 | 52° 20' 30,672" N | 20° 25' 13,026" E | 29 | 52° 20' 30,902" N | 20° 25' 15,689" E |
| 30 | 52° 20' 31,848" N | 20° 25' 14,676" E | 30 | 52° 20' 32,794" N | 20° 25' 11,484" E |
| 31 | 52° 20' 30,468" N | 20° 25' 16,656" E | 31 | 52° 20' 25,821" N | 20° 25' 10,771" E |
| 32 | 52° 20' 29,269" N | 20° 25' 18,814" E | 32 | 52° 20' 24,419" N | 20° 25' 9,817" E  |
| 33 | 52° 20' 28,746" N | 20° 25' 21,714" E | 33 | 52° 20' 28,078" N | 20° 25' 15,389" E |
| 34 | 52° 20' 29,724" N | 20° 25' 24,492" E | 34 | 52° 20' 26,821" N | 20° 25' 16,607" E |
| 35 | 52° 20' 31,902" N | 20° 25' 25,092" E | 35 | 52° 20' 31,390" N | 20° 25' 10,670" E |
| 36 | 52° 20' 32,784" N | 20° 25' 23,262" E | 36 | 52° 20' 26,144" N | 20° 25' 19,523" E |
| 37 | 52° 20' 33,511" N | 20° 25' 20,254" E | 37 | 52° 20' 31,273" N | 20° 25' 13,323" E |
| 38 | 52° 20' 33,576" N | 20° 25' 17,520" E | 38 | 52° 20' 32,293" N | 20° 25' 17,552" E |
| 39 | 52° 20' 33,606" N | 20° 25' 14,742" E | 39 | 52° 20' 31,689" N | 20° 25' 21,449" E |
| 40 | 52° 20' 34,308" N | 20° 25' 12,204" E | 40 | 52° 20' 31,499" N | 20° 25' 22,981" E |
| 41 | 52° 20' 34,644" N | 20° 25' 10,398" E | 41 | 52° 20' 30,458" N | 20° 25' 24,067" E |
| 42 | 52° 20' 33,558" N | 20° 25' 7,656" E  | 42 | 52° 20' 24,146" N | 20° 25' 7,570" E  |
| 43 | 52° 20' 32,736" N | 20° 25' 10,272" E | 43 | 52° 20' 30,739" N | 20° 25' 11,418" E |

Table 7S. Geographical coordinates of F1 and F2 plant material from the „Wi“ locations.

| number trees | F1                |                   | numbers seedlings | F2                |                   |
|--------------|-------------------|-------------------|-------------------|-------------------|-------------------|
|              | N                 | E                 |                   | N                 | E                 |
| 1            | 52° 18' 41,730" N | 20° 39' 34,380" E | 1                 | 52° 18' 41,592" N | 20° 39' 34,668" E |
| 2            | 52° 18' 40,812" N | 20° 39' 34,524" E | 2                 | 52° 18' 40,140" N | 20° 39' 34,962" E |
| 3            | 52° 18' 39,186" N | 20° 39' 34,890" E | 3                 | 52° 18' 39,246" N | 20° 39' 36,084" E |
| 4            | 52° 18' 37,716" N | 20° 39' 35,538" E | 4                 | 52° 18' 37,656" N | 20° 39' 35,652" E |
| 5            | 52° 18' 36,660" N | 20° 39' 34,788" E | 5                 | 52° 18' 36,264" N | 20° 39' 35,400" E |
| 6            | 52° 18' 35,616" N | 20° 39' 34,920" E | 6                 | 52° 18' 35,028" N | 20° 39' 34,872" E |
| 7            | 52° 18' 34,662" N | 20° 39' 36,660" E | 7                 | 52° 18' 34,482" N | 20° 39' 35,958" E |
| 8            | 52° 18' 33,402" N | 20° 39' 36,696" E | 8                 | 52° 18' 33,270" N | 20° 39' 37,938" E |
| 9            | 52° 18' 31,872" N | 20° 39' 37,302" E | 9                 | 52° 18' 32,124" N | 20° 39' 39,258" E |



|    |                   |                   |    |                   |                   |
|----|-------------------|-------------------|----|-------------------|-------------------|
| 10 | 52° 18' 30,162" N | 20° 39' 37,140" E | 10 | 52° 18' 29,712" N | 20° 39' 37,200" E |
| 11 | 52° 18' 28,158" N | 20° 39' 38,316" E | 11 | 52° 18' 28,104" N | 20° 39' 38,286" E |
| 12 | 52° 18' 26,874" N | 20° 39' 39,342" E | 12 | 52° 18' 27,396" N | 20° 39' 40,662" E |
| 13 | 52° 18' 26,460" N | 20° 39' 41,832" E | 13 | 52° 18' 26,214" N | 20° 39' 42,672" E |
| 14 | 52° 18' 27,912" N | 20° 39' 42,684" E | 14 | 52° 18' 27,834" N | 20° 39' 42,342" E |
| 15 | 52° 18' 29,058" N | 20° 39' 42,726" E | 15 | 52° 18' 28,692" N | 20° 39' 43,602" E |
| 16 | 52° 18' 30,834" N | 20° 39' 42,726" E | 16 | 52° 18' 30,276" N | 20° 39' 44,022" E |
| 17 | 52° 18' 32,148" N | 20° 39' 42,162" E | 17 | 52° 18' 33,048" N | 20° 39' 44,040" E |
| 18 | 52° 18' 33,630" N | 20° 39' 41,424" E | 18 | 52° 18' 33,432" N | 20° 39' 42,942" E |
| 19 | 52° 18' 35,148" N | 20° 39' 40,254" E | 19 | 52° 18' 34,962" N | 20° 39' 42,318" E |
| 20 | 52° 18' 37,074" N | 20° 39' 40,626" E | 20 | 52° 18' 35,328" N | 20° 39' 41,046" E |
| 21 | 52° 18' 38,532" N | 20° 39' 39,402" E | 21 | 52° 18' 37,290" N | 20° 39' 39,288" E |
| 22 | 52° 18' 40,224" N | 20° 39' 38,718" E | 22 | 52° 18' 39,936" N | 20° 39' 38,520" E |
| 23 | 52° 18' 42,078" N | 20° 39' 37,590" E | 23 | 52° 18' 41,082" N | 20° 39' 37,176" E |
| 24 | 52° 18' 43,428" N | 20° 39' 38,130" E | 24 | 52° 18' 42,714" N | 20° 39' 37,626" E |
| 25 | 52° 18' 42,942" N | 20° 39' 40,956" E | 25 | 52° 18' 43,434" N | 20° 39' 41,304" E |
| 26 | 52° 18' 42,144" N | 20° 39' 43,176" E | 26 | 52° 18' 41,382" N | 20° 39' 43,800" E |
| 27 | 52° 18' 40,074" N | 20° 39' 45,270" E | 27 | 52° 18' 39,990" N | 20° 39' 47,412" E |
| 28 | 52° 18' 38,664" N | 20° 39' 46,656" E | 28 | 52° 18' 38,412" N | 20° 39' 47,190" E |
| 29 | 52° 18' 36,900" N | 20° 39' 47,316" E | 29 | 52° 18' 37,356" N | 20° 39' 48,612" E |
| 30 | 52° 18' 35,472" N | 20° 39' 48,444" E | 30 | 52° 18' 35,712" N | 20° 39' 50,088" E |
| 31 | 52° 18' 34,170" N | 20° 39' 49,260" E | 31 | 52° 18' 34,104" N | 20° 39' 48,702" E |
| 32 | 52° 18' 33,024" N | 20° 39' 49,962" E | 32 | 52° 18' 33,240" N | 20° 39' 47,940" E |
| 33 | 52° 18' 31,380" N | 20° 39' 51,294" E | 33 | 52° 18' 31,002" N | 20° 39' 48,030" E |
| 34 | 52° 18' 29,598" N | 20° 39' 51,540" E | 34 | 52° 18' 29,970" N | 20° 39' 49,146" E |
| 35 | 52° 18' 28,260" N | 20° 39' 51,720" E | 35 | 52° 18' 28,062" N | 20° 39' 49,446" E |
| 36 | 52° 18' 26,610" N | 20° 39' 51,366" E | 36 | 52° 18' 26,664" N | 20° 39' 49,386" E |
| 37 | 52° 18' 24,504" N | 20° 39' 50,268" E | 37 | 52° 18' 25,260" N | 20° 39' 49,686" E |
| 38 | 52° 18' 22,170" N | 20° 39' 49,068" E | 38 | 52° 18' 22,194" N | 20° 39' 50,514" E |
| 39 | 52° 18' 20,418" N | 20° 39' 48,750" E | 39 | 52° 18' 21,024" N | 20° 39' 50,022" E |
| 40 | 52° 18' 20,958" N | 20° 39' 56,958" E | 40 | 52° 18' 20,027" N | 20° 39' 56,513" E |
| 41 | 52° 18' 22,428" N | 20° 39' 57,828" E | 41 | 52° 18' 21,648" N | 20° 39' 57,239" E |
| 42 | 52° 18' 23,694" N | 20° 39' 58,188" E | 42 | 52° 18' 23,472" N | 20° 39' 57,888" E |
| 43 | 52° 18' 25,668" N | 20° 39' 57,882" E | 43 | 52° 18' 25,056" N | 20° 39' 56,118" E |
| 44 | 52° 18' 27,372" N | 20° 39' 57,414" E | 44 | 52° 18' 27,492" N | 20° 39' 56,928" E |
| 45 | 52° 18' 28,656" N | 20° 39' 57,330" E | 45 | 52° 18' 29,244" N | 20° 39' 57,294" E |
| 46 | 52° 18' 30,024" N | 20° 39' 57,366" E | 46 | 52° 18' 30,642" N | 20° 39' 56,616" E |
| 47 | 52° 18' 31,872" N | 20° 39' 57,492" E | 47 | 52° 18' 31,530" N | 20° 39' 57,906" E |
| 48 | 52° 18' 33,210" N | 20° 39' 58,554" E |    |                   |                   |
| 49 | 52° 18' 34,974" N | 20° 39' 59,022" E |    |                   |                   |
| 50 | 52° 18' 36,810" N | 20° 39' 58,788" E |    |                   |                   |

Table 8S. Biodiversity at the genetic level in the analysed locations: Na—number of alleles; Ne—effective number of alleles ;No. Private alleles - numbers private alleles by analysed populations; h—diversity.

| Population          | S (F1) | S (F2) | CG (F1) | CG (F2) | Gr (F1) | Gr (F2) | Wi (F1) | Wi (F2) | W (F1) | W (F2) | KG (F1) | KG (F2) | N (F1) | N (F2) |
|---------------------|--------|--------|---------|---------|---------|---------|---------|---------|--------|--------|---------|---------|--------|--------|
| Na                  | 4,5    | 3,5    | 3,7     | 3,8     | 4,0     | 4,0     | 4,2     | 3,8     | 4,0    | 3,5    | 4,0     | 4,2     | 4,2    | 4,0    |
| Na Freq. >= 5%      | 3,0    | 2,3    | 3,3     | 3,2     | 3,2     | 3,0     | 2,8     | 2,5     | 2,7    | 3,5    | 2,8     | 3,2     | 2,5    | 3,7    |
| Ne                  | 2,3    | 1,8    | 2,3     | 2,2     | 2,1     | 2,1     | 2,2     | 2,0     | 2,2    | 2,4    | 2,3     | 2,0     | 2,0    | 2,1    |
| No. Private Alleles | 0,5    | 0,2    | 0,0     | 0,0     | 0,0     | 0,3     | 0,3     | 0,0     | 0,0    | 0,0    | 0,2     | 0,3     | 0,0    | 0,2    |
| h                   | 0,5    | 0,4    | 0,5     | 0,5     | 0,5     | 0,5     | 0,5     | 0,4     | 0,5    | 0,5    | 0,5     | 0,5     | 0,4    | 0,5    |

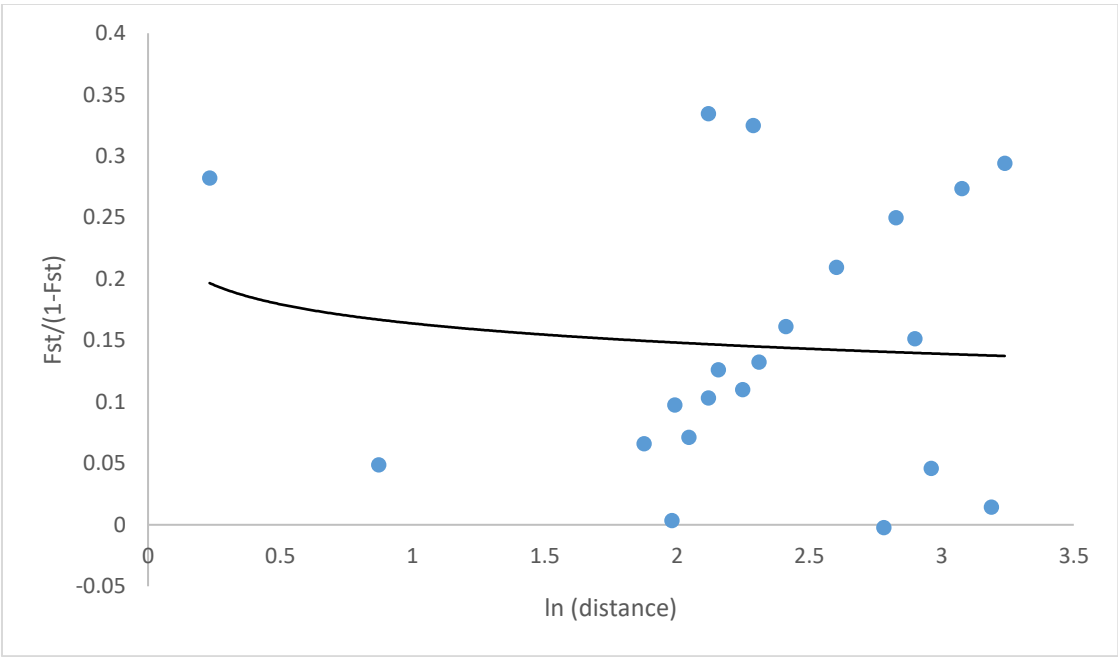

Figure 1S. Correlation of geographical and genetic distance in IBD Mantel [30] for F1.

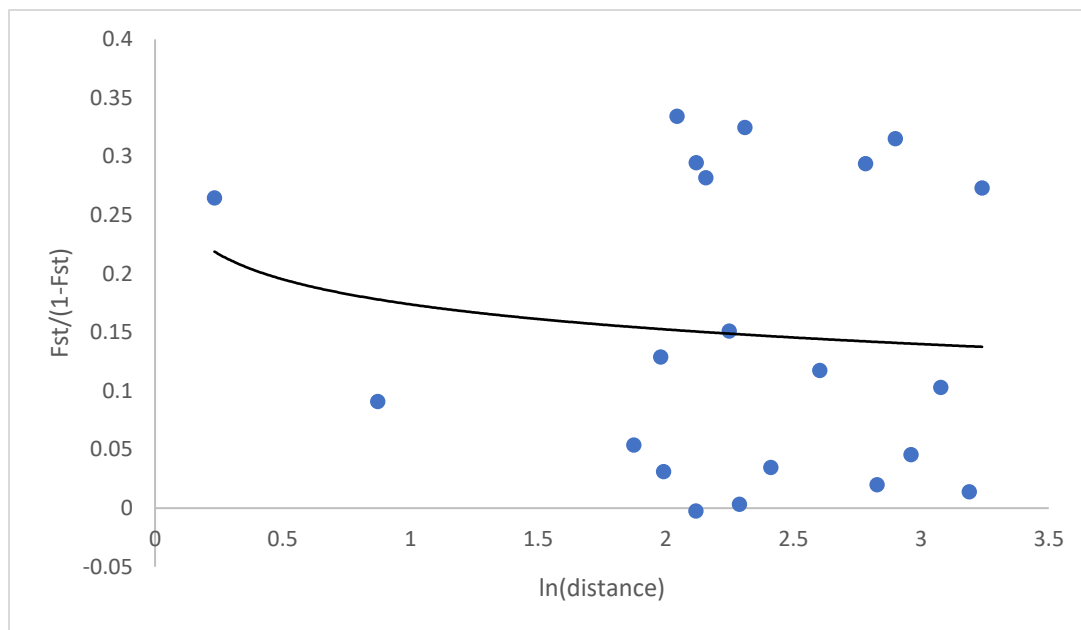

Figure 2S. Correlation of geographical and genetic distance in IBD Mantel [30] for F2.
